# Supplementary material
Source: publisher figshare collection journal article supplement (https://acs.figshare.com/ndownloader/files/3785584)
Supplement: Supplementary file 1 [file 3785584]

Table S1. Effect of Heat, pH, and Hydrolytic Enzyme Treatment on the Antifungal

| Activity from B154 Strain   |                                             |
|-----------------------------|---------------------------------------------|
| Treatments                  | Antifungal activity <sup>a</sup><br>(AU/mL) |
| None (control)              | 24.17±1.0 a                                 |
| Heat <sup>b</sup>           |                                             |
| 40 °C                       | 23.83±1.5 a                                 |
| 50 °C                       | 23.63±1.6 a                                 |
| 60 °C                       | 23.48±1.6 a                                 |
| 70 °C                       | 23.36±1.8 a                                 |
| 80 °C                       | 23.14±1.5 a                                 |
| 90 °C                       | 22.78±0.7 a                                 |
| 100 °C                      | 8.98±0.7 b                                  |
| Autoclaving 121 °C          | 8.54±0.8 b                                  |
| pH                          |                                             |
| 2                           | 10.76±1.2 bc                                |
| 3                           | 10.82±0.9bc                                 |
| 4                           | 23.55±1.6 a                                 |
| 5                           | 23.55±1.4 a                                 |
| 6                           | 24.00±2.0 a                                 |
| 7                           | 23.91±1.7 a                                 |
| 8                           | 23.77±1.7 a                                 |
| 9                           | 23.87±2.0 a                                 |
| 10                          | 22.95±1.8 a                                 |
| 11                          | 11.26±1.1 bc                                |
| 12                          | 3.23±0.3 bd                                 |
| Enzyme                      |                                             |
| None (control)              | 6.05±0.6 a                                  |
| Peptide/enzyme 1:10 (wt/wt) |                                             |
| Proteinase K                | 5.99±0.9 a                                  |
| Pepsin                      | 5.86±0.8 a                                  |

|                            |            |
|----------------------------|------------|
| Papain                     | 6.11±0.9 a |
| Trypsinase                 | 5.86±0.7 a |
| Peptide/enzyme 1:5 (wt/wt) |            |
| Proteinase K               | 5.74±0.9 a |
| Pepsin                     | 5.69±0.7 a |
| Papain                     | 5.97±0.5 a |
| Trypsinase                 | 5.73±0.9 a |

<sup>a</sup> Activity is expressed as activity units (AU) against *N. sitophila*. <sup>b</sup> Samples were treated at 121 °C for 20 min, and for 30 min at other temperatures. Data are expressed as the mean ± SD, n=9.
